# Supplementary material
Source: PubMed Central journal article supplement (PMC9552049)
Supplement: jamainternmed-e224373-s003.pdf [file jamainternmed-e224373-s003.pdf]

## Data Sharing Statement

Iyasere. Effect of Increased Interprofessional Familiarity on Team Performance, Communication, and Psychological Safety on Inpatient Medical Teams. *JAMA Intern Med.* Published October 10, 2022. doi:10.1001/jamainternmed.2022.4373

### Data

**Data available:** No

### Additional Information

**Explanation for why data not available:** The data collected in this study include videos of participants performing medical simulations, Microsoft Access time motion data of participants on rounds, survey results and de-identified patient data. Given that participant data is unable to be completely deidentified it will not be made widely available.
